# Supplementary material for: Flexible near-infrared polarized photodetector based on CuPc single crystal grown by microspacing in-air sublimation
Source: Royal Society of Chemistry journal article supplement (doi:10.1039/d3tc03016d), 2023-01-01
Supplement: d3tc03016d1.pdf [file d3tc03016d1.pdf]

## Supporting Information

Flexible near-infrared polarized photodetector based on CuPc single  
crystal grown by microspacing in-air sublimation

Mengru Li,<sup>a</sup> Qianqian Du,<sup>\*a</sup> Yanxun Zhang,<sup>a</sup> Yunlong Liu,<sup>a</sup> Wenjun Wang,<sup>a</sup> Fengqiu  
Wang,<sup>\*b</sup> and Shuchao Qin,<sup>\*a</sup>

<sup>a</sup>Key Laboratory of Optical Communication Science and Technology of Shandong  
Province, School of Physical Science and Information Engineering, Liaocheng  
University, Liaocheng 252059, China

<sup>b</sup>School of Electronic Science and Engineering, Ministry of Education, Nanjing  
University, Nanjing 210093, China

Corresponding Authors:

\*E-mail: Shuchao Qin (lcqinshuchao@126.com); Qianqian Du (dzdq0126@163.com);

Fengqiu Wang (fwang@nju.edu.cn)

### S1. AFM image of the CuPc single crystal surface

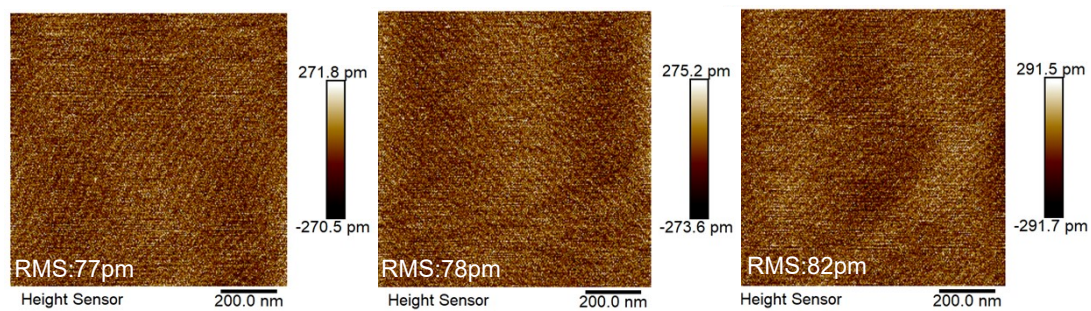

**Figure S1.** AFM image of the CuPc single crystal surface.

### S2. Cross-polarized optical microscopy images of a CuPc single crystal

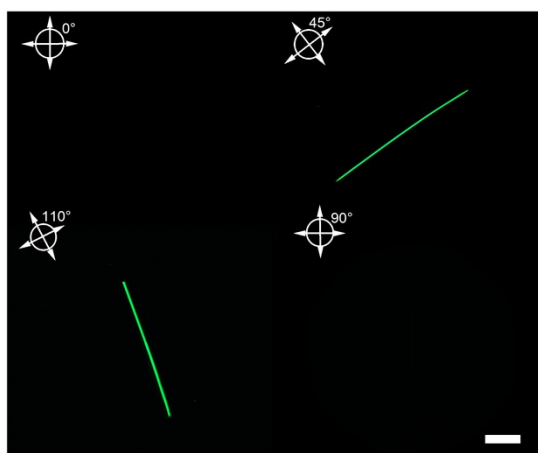

**Figure S2.** Cross-polarized optical microscopy images of a CuPc single crystal in different polarization directions. Scale bar: 10 $\mu$ m.

### S3. SEM image of the CuPc single crystal nanowires

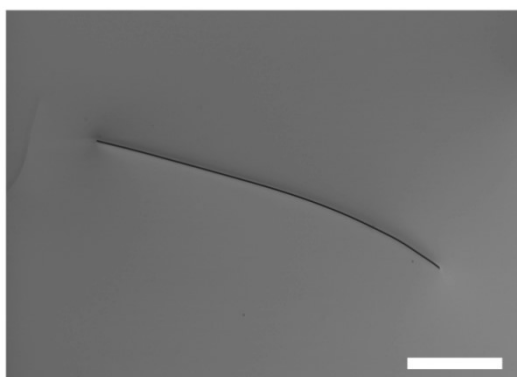

**Figure S3.** SEM image of the CuPc single crystal nanowires. Scale bar: 20  $\mu\text{m}$ .

### S4. SEM image of the CuPc device

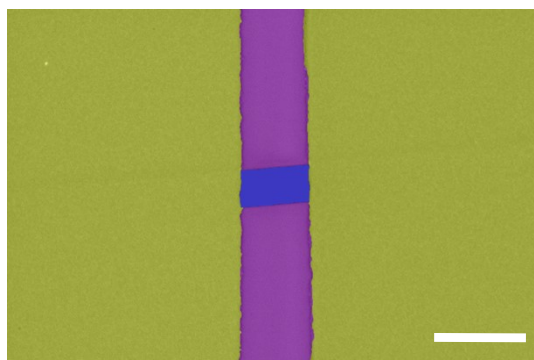

**Figure S4.** The false-color SEM image of CuPc transistor. Scale bar: 10  $\mu\text{m}$ .

### S5. CuPc single crystal FET transfer curves

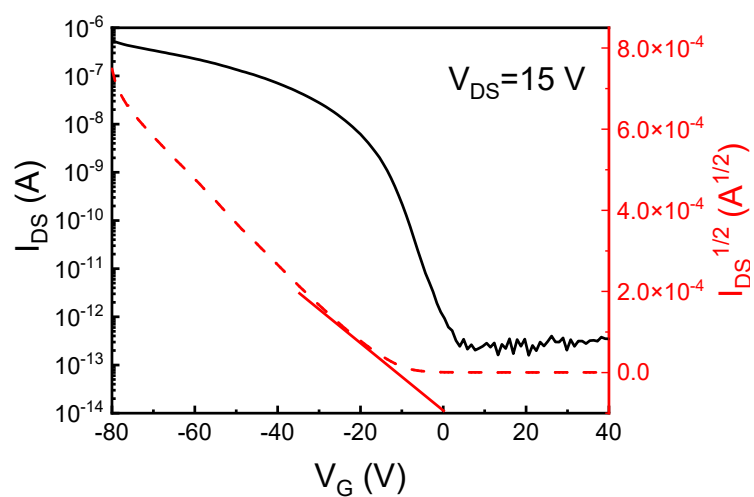

**Figure S5.** CuPc single crystal FET transfer curve under dark conditions.

### S6. The output curve

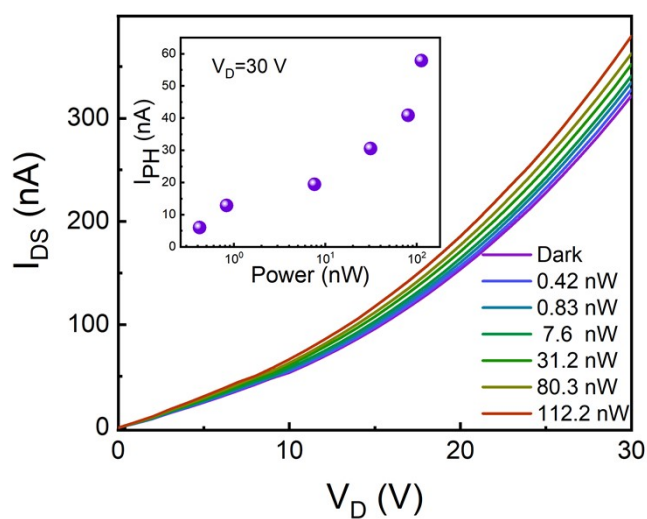

**Figure S6.** The output curve under different incident laser power densities (785 nm) at  $V_{GS} = -60V$ . Inset: Photocurrent of the device versus illumination power at  $V_{DS} = 30 V$ .

### S7. The noise current spectral density

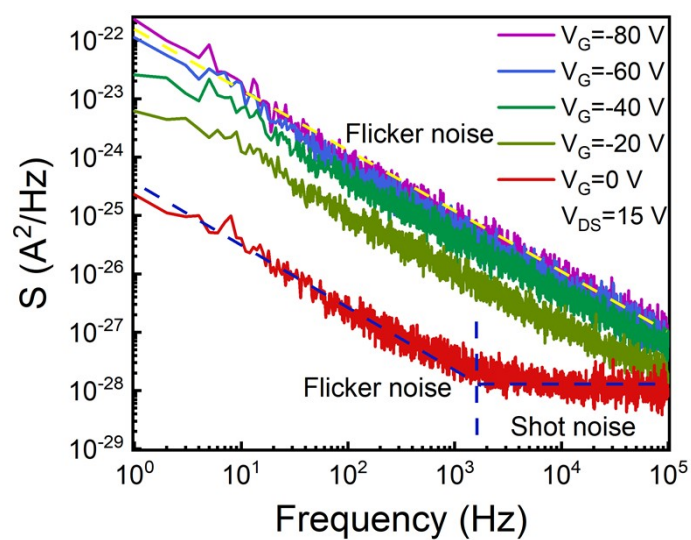

**Figure S7.** Noise current spectral density of the device under different gate bias.

### S8. Dual gate sweeping curve

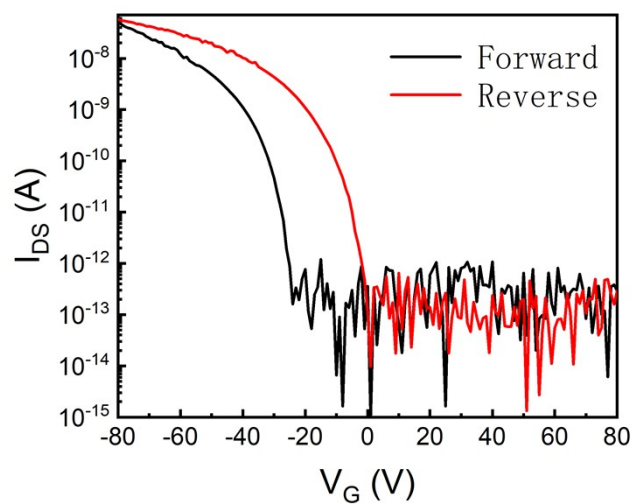

**Figure S8.** Transfer curve for a forward (black curve) and reverse sweep (red curve).

### S9. The flattened photocurrent response of the device

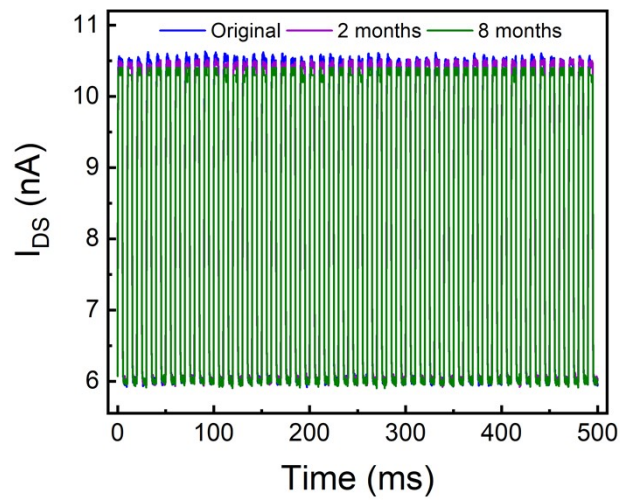

**Figure S9.** The flattened photocurrent response of the device as fabricated and after 0-8 months under 785nm illumination at  $V_G=0V$ .

**S10. Schematic diagram of the single-pixel imaging measurement system**

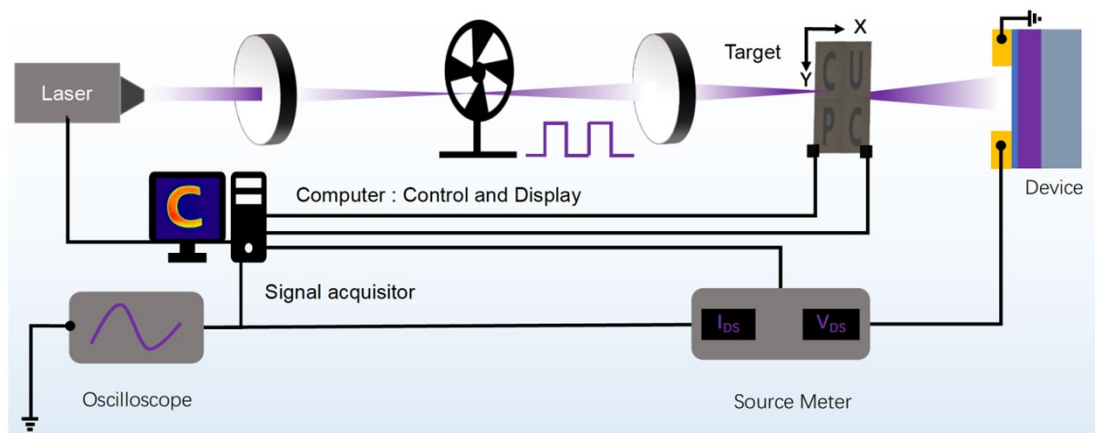

**Figure S10.** Schematic diagram of the single-pixel imaging measurement system. The modulated laser is focused onto the device by an objective lens. During the measurements, the measured object is moved by the step controller.
